# Supplementary material for: Quantitative Immobilization of Phthalocyanine onto Bacterial Cellulose for Construction of a High-Performance Catalytic Membrane Reactor
Source: PubMed Central journal article supplement (PMC5551888; doi:10.3390/ma10070846), 2017-07-24
Supplement: materials-10-00846-s001.pdf [file materials-10-00846-s001.pdf]

Article

# Quantitative Immobilization of Phthalocyanine onto Bacterial Cellulose for Construction of High Performance Catalytic Membrane Reactor

Shiliang Chen\*, Qiaoling Teng

Qianjiang College, Hangzhou Normal University, Hangzhou 310012, China; [tengql1996@sina.com](mailto:tengql1996@sina.com) (Q.T.)

\* Correspondence: [bruceblue@zju.edu.cn](mailto:bruceblue@zju.edu.cn) (S.C.); Tel.: +86 571 28861372

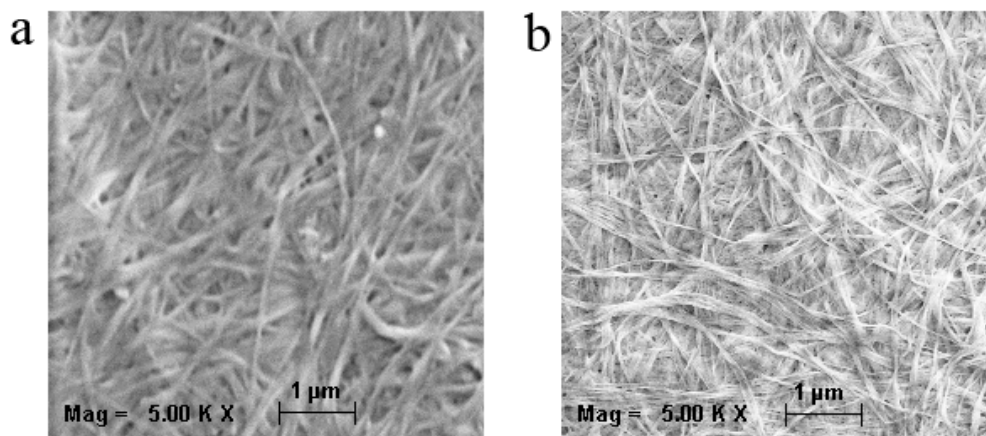

Figure S1. FESEM of (a) pure BC, and (b) CoPc@BC.

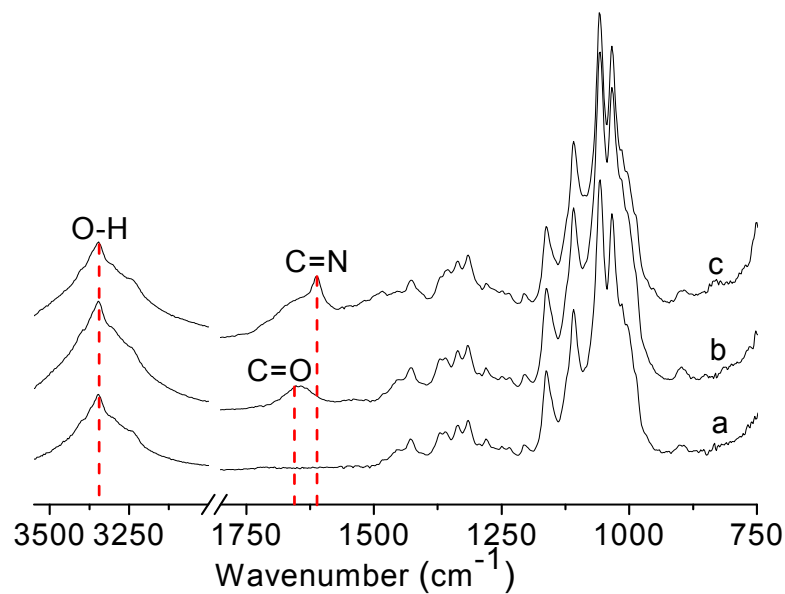

Figure S2. ATR/FT-IR spectra of (a) BC, (b) oxidized BC, and (c) CoPc@BC.

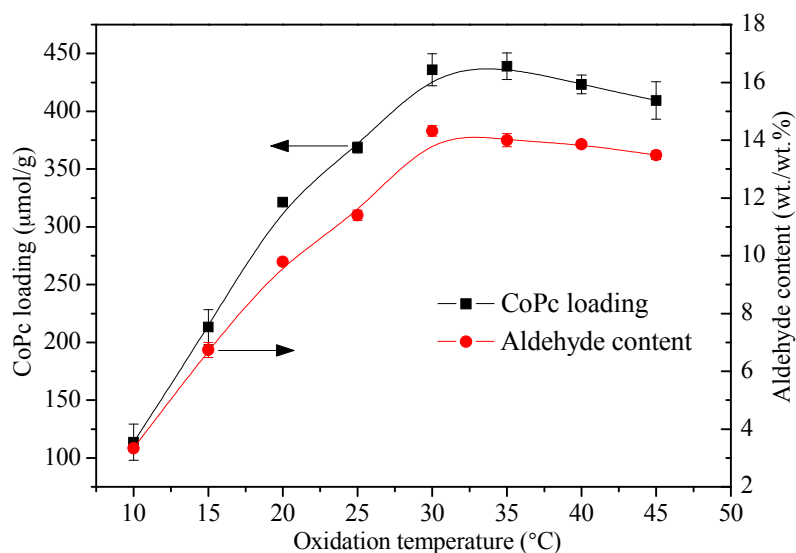

**Figure S3.** Effect of oxidation temperature on CoPc loading of CoPc@BC (filled square) and aldehyde content of BC (filled circle),  $[\text{NaIO}_4]=30$  mmol/L, reaction time=8 h.

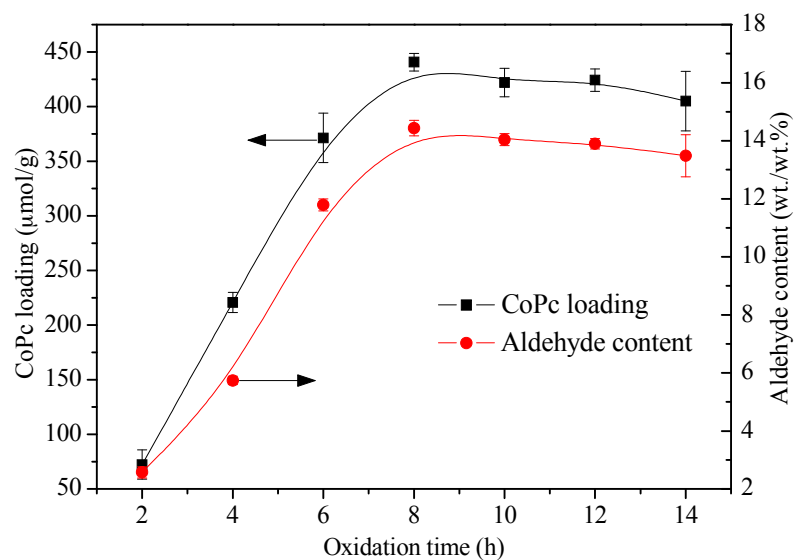

**Figure S4.** Effect of oxidation time on CoPc loading of CoPc@BC (filled square) and aldehyde content of BC (filled circle),  $[\text{NaIO}_4]=30$  mmol/L,  $T=30$  °C.

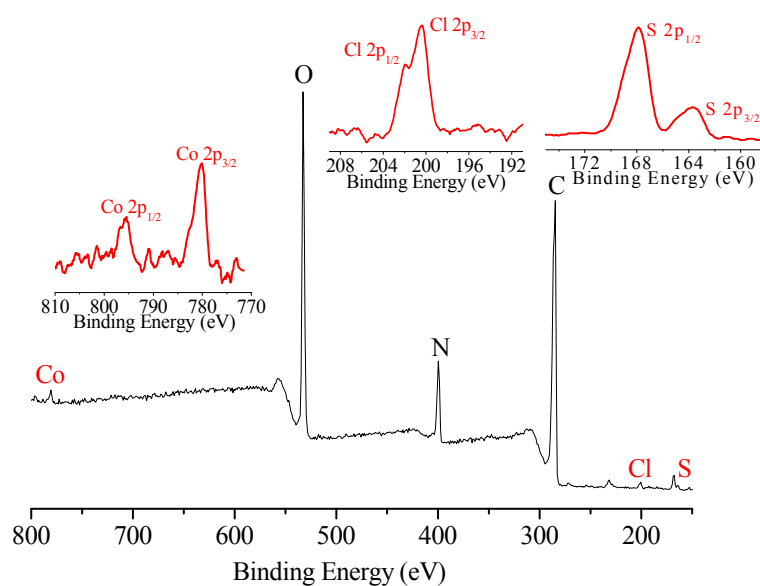

**Figure S5.** XPS of surface of CoPc@BC after dye adsorption. Left inset: detail of Co region, middle inset: detail of Cl region, right inset: detail of S region.

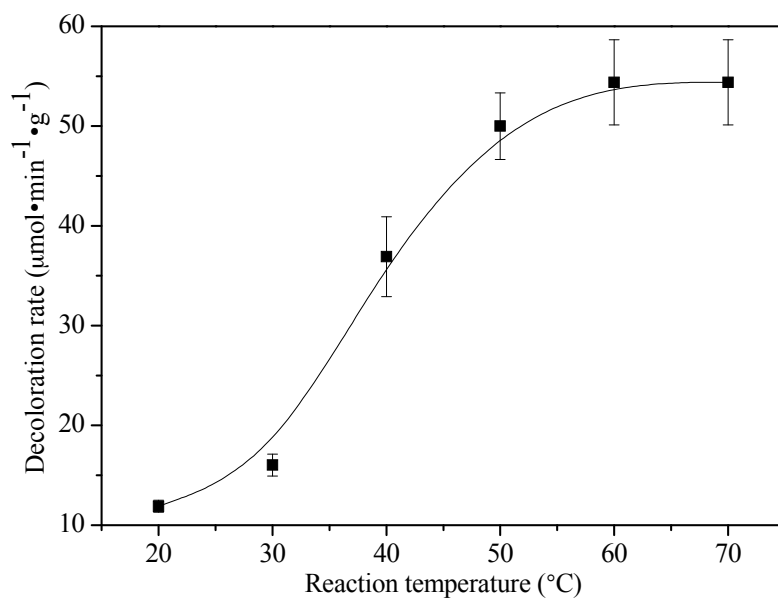

**Figure S6.** Effect of reaction temperature on decoloration rate of reactive red X-3B (flow rate: 6 mL/min, H<sub>2</sub>O<sub>2</sub> concentration: 10 mmol/L).

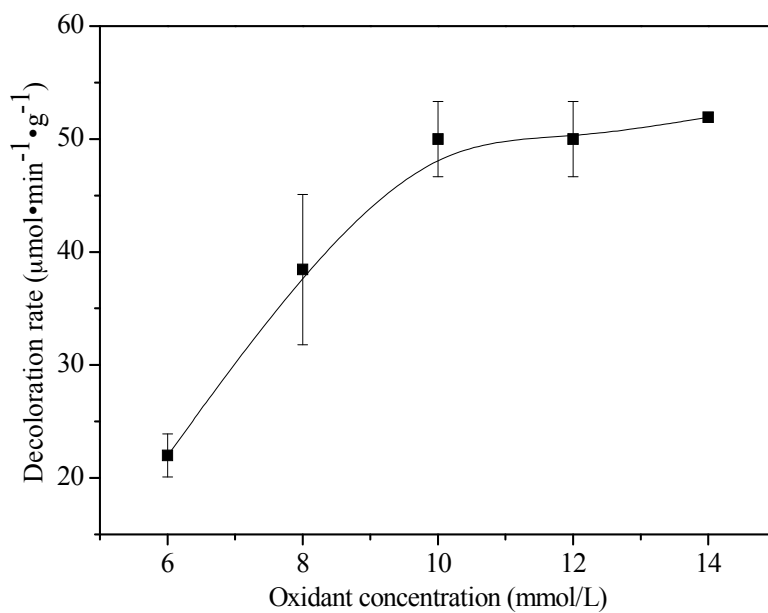

**Figure S7.** Effect of initial H<sub>2</sub>O<sub>2</sub> concentration on decoloration rate of reactive red X-3B (flow rate: 6 mL/min, T=50 °C).

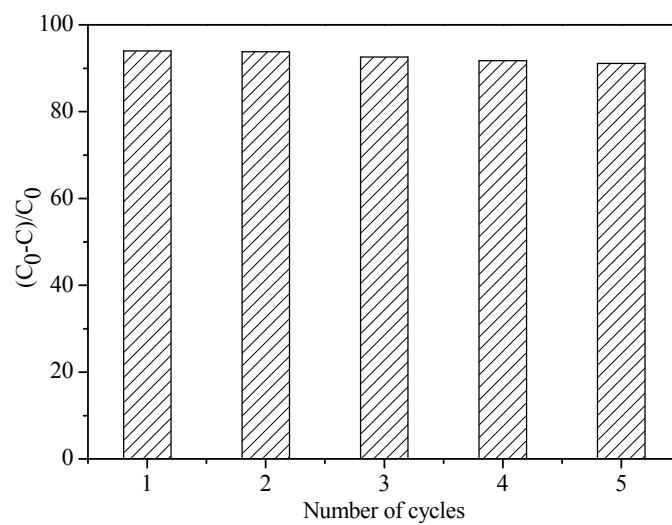

**Figure S8.** Repetitive catalytic oxidation of reactive red X-3B (initial concentration:  $1 \times 10^{-4}$  mol/L, CoPc@BC: 1.60 mg, flow rate: 6 mL/min, H<sub>2</sub>O<sub>2</sub> concentration: 10 mmol/L, T=50 °C) for 60 min.
